# Supplementary material for: Hyperactivity in Mice Induced by Opioid Agonists with Partial Intrinsic Efficacy and Biased Agonism Administered Alone and in Combination with Morphine
Source: MDPI journal article supplement (doi:10.3390/biom13060935), 2023-06-02
Supplement: s1 [file s1]

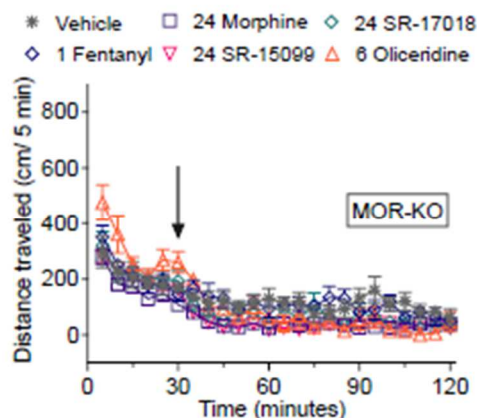

| MOR-KO drug vs vehicle |                 | Two-way RM ANOVA |                             |          |                                |          |            |       |                  |  |
|------------------------|-----------------|------------------|-----------------------------|----------|--------------------------------|----------|------------|-------|------------------|--|
| Figure                 | Drug vs vehicle | Time (min)       | F (DFn, DFd)<br>Time x Drug | p-Value  | F (DFn, DFd)<br>Drug v Vehicle | p-Value  | Difference | SE    | Drug treatment n |  |
| SF1A                   | 1 Fentanyl      | 35-120           | F (17, 204) = 1.284         | P=0.2055 | F (1, 12) = 0.02158            | P=0.8857 | 4.46       | 30.36 | 7                |  |
|                        | 24 Morphine     | 35-120           | F (17, 272) = 1.151         | P=0.3055 | F (1, 16) = 8.927              | P=0.0087 | -66.85     | 22.37 | 7                |  |
|                        | 6 Oliceridine   | 35-120           | F (17, 221) = 2.231         | P=0.0044 | F (1, 13) = 2.472              | P=0.1399 | -46.65     | 29.67 | 4                |  |
|                        | 24 SR-15099     | 35-60            | F (17, 340) = 1.281         | P=0.2016 | F (1, 20) = 13.60              | P=0.0015 | -68.43     | 18.56 | 11               |  |
|                        | 24 SR-17018     | 35-120           | F (17, 221) = 0.8418        | P=0.6436 | F (1, 13) = 1.856              | P=0.1962 | -40.36     | 29.63 | 4                |  |
| vehicle: n=11          |                 |                  |                             |          |                                |          |            |       |                  |  |

**Figure S1.** A lack of opioid-induced hyperactivity in MOR-KO mice. Male MOR-KO (n = 4–11) were IP treated with vehicle or the highest dose of each opioid tested after a 30-minute habituation period. Distance traveled (cm/5-minute bins) for 90 minutes was recorded and no locomotor stimulation was observed in the MOR-KO. Data are presented as mean  $\pm$  SEM.

### A. Morphine potentiates *d*-Amphetamine LMA

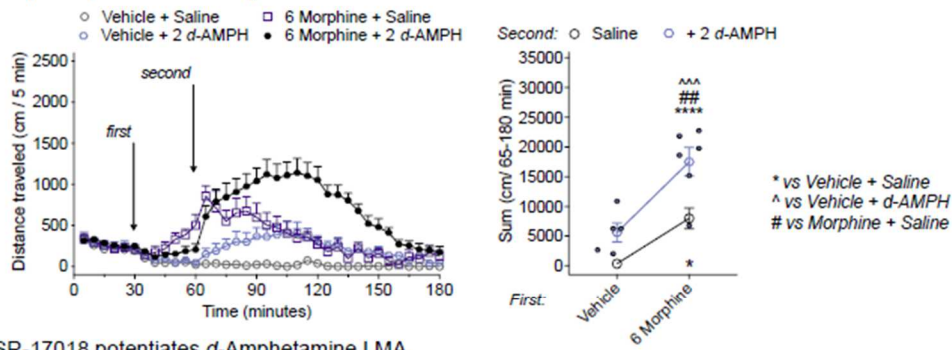

### B. SR-17018 potentiates *d*-Amphetamine LMA

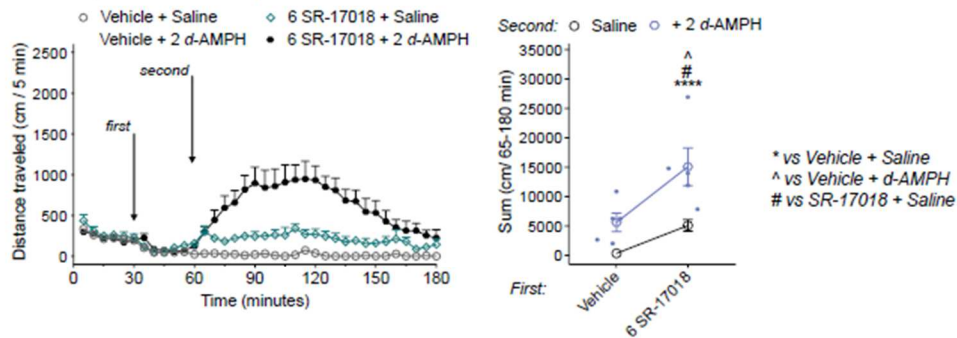

### Locomotor Activity

| TIMECOURSE |                            | Two-way RM ANOVA           |        |                             |             |                             |         |
|------------|----------------------------|----------------------------|--------|-----------------------------|-------------|-----------------------------|---------|
| Figure     | Treatment                  | Compared to                | Time   | F (DFn, DFd)<br>time x drug | p-Value     | F (DFn, DFd)<br>drug effect | p-Value |
| SF2A       | Vehicle + d-Amphetamine    | Vehicle + Saline           | 65-180 | F (29, 281) = 7.383         | <0.0001     | F (1, 9) = 12.34            | 0.0066  |
|            | 6 Morphine + Saline        | Vehicle + Saline           | 65-180 | F (29, 232) = 10.67         | <0.0001     | F (1, 8) = 30.45            | 0.0006  |
|            | 6 Morphine + d-Amphetamine | Vehicle + Saline           | 65-180 | F (29, 290) = 20.05         | <0.0001     | F (1, 10) = 50.83           | <0.0001 |
|            | Vehicle + d-Amphetamine    | 6 Morphine + d-Amphetamine | 65-180 | F (29, 281) = 6.634         | <0.0001     | F (1, 9) = 15.35            | 0.0035  |
|            | 6 Morphine + Saline        | 6 Morphine + d-Amphetamine | 65-180 | F (29, 232) = 7.194         | <0.0001     | F (1, 8) = 6.193            | 0.0376  |
| SF2B       | Vehicle + d-Amphetamine    | Vehicle + Saline           | 65-180 | F (29, 281) = 7.383         | <0.0001     | F (1, 9) = 12.34            | 0.0066  |
|            | 6 SR-17018 + Saline        | Vehicle + Saline           | 65-180 | F (29, 232) = 4.234         | <0.0001     | F (1, 8) = 44.02            | 0.0002  |
|            | 6 SR-17018 + d-Amphetamine | Vehicle + Saline           | 65-180 | F (29, 281) = 14.73         | <0.0001     | F (1, 9) = 27.44            | 0.0005  |
|            | Vehicle + d-Amphetamine    | 6 SR-17018 + d-Amphetamine | 65-180 | F (29, 232) = 3.882         | <0.0001     | F (1, 8) = 7.116            | 0.0285  |
|            | 6 SR-17018 + Saline        | 6 SR-17018 + d-Amphetamine | 65-180 | F (29, 203) = 5.484         | <0.0001     | F (1, 7) = 7.291            | 0.0306  |
| Figure     | Treatment                  | Compared to                | Time   | p-Value                     | treatment n |                             |         |
| SF2A       | Vehicle + d-Amphetamine    | Vehicle + Saline           | 65-180 | 0.1825                      | 5           | ns                          |         |
|            | 6 Morphine + Saline        | Vehicle + Saline           | 65-180 | 0.0375                      | 4           | *                           |         |
|            | 6 Morphine + d-Amphetamine | Vehicle + Saline           | 65-180 | <0.0001                     | 5           | ****                        |         |
|            | Vehicle + d-Amphetamine    | 6 Morphine + d-Amphetamine | 65-180 | 0.0005                      | 5           | ***                         |         |
|            | 6 Morphine + Saline        | 6 Morphine + d-Amphetamine | 65-180 | 0.0075                      | 5           | ##                          |         |
| SF2B       | Vehicle + d-Amphetamine    | Vehicle + Saline           | 65-180 | 0.2198                      | 8           | ns                          |         |
|            | 6 SR-17018 + Saline        | Vehicle + Saline           | 65-180 | 0.3739                      | 4           | ns                          |         |
|            | 6 SR-17018 + d-Amphetamine | Vehicle + Saline           | 65-180 | <0.0001                     | 7           | ****                        |         |
|            | Vehicle + d-Amphetamine    | 6 SR-17018 + d-Amphetamine | 65-180 | 0.0102                      | 4           | ^                           |         |
|            | 6 SR-17018 + Saline        | 6 SR-17018 + d-Amphetamine | 65-180 | 0.0107                      | 5           | #                           |         |

**Figure S2.** SR-17018, like, morphine, increases *d*-amphetamine-induced locomotor activity. (A,B). Pretreatment with the vehicle, morphine (6 mg/kg, i.p.), or SR-17018 (6 mg/kg, i.p.) for 30 minutes followed by challenge with saline or *d*-amphetamine (2 mg/kg, i.p.) in male C57BL6 mice (n=4-6). Effects over time (left) and sum of the distance traveled (cm) from 65-180 minutes for individual mice (right) are shown in (A,B). Comparison of sums are indicated in the figure. Data are presented as mean  $\pm$  SEM of the total distance (cm).

### A. SR-17018 reversal of Morphine LMA @ 30 min

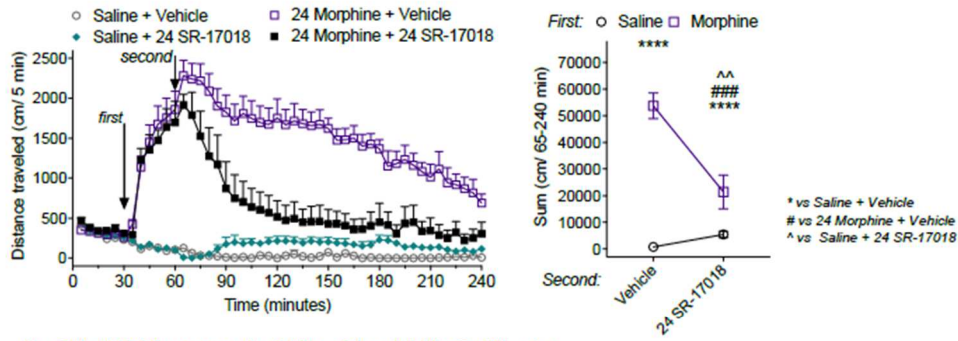

### B. SR-17018 reversal of Morphine LMA @ 60 min

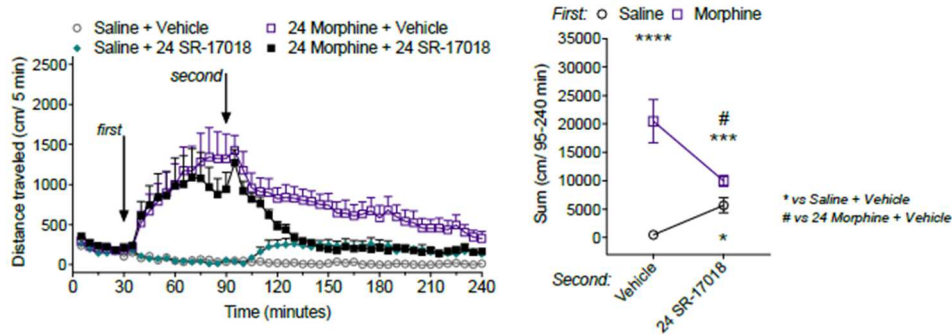

### C. Naloxone reversal of Morphine LMA @ 60 min

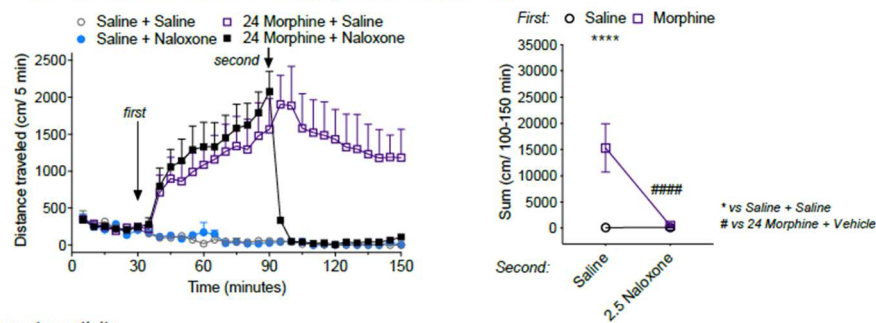

#### Locomotor activity

| Figure                                                       | Treatment                  | Compared to                | Time    | F (DFn, DFd)        | p-Value     | F (DFn, DFd)      | p-Value | treatment n |
|--------------------------------------------------------------|----------------------------|----------------------------|---------|---------------------|-------------|-------------------|---------|-------------|
| Two-way RM ANOVA                                             |                            |                            |         |                     |             |                   |         |             |
| SF3A                                                         | 24 Morphine + Vehicle      | Saline + Vehicle           | 65-240  | F (35, 350) = 7.374 | <0.0001     | F (1, 10) = 83.36 | <0.0001 | 7           |
|                                                              | Saline + 24 SR-17018       | Saline + Vehicle           | 65-240  | F (35, 350) = 2.886 | <0.0001     | F (1, 10) = 11.04 | 0.0077  | 7           |
|                                                              | 24 Morphine + Vehicle      | 24 Morphine + 24 SR-17018  | 65-240  | F (35, 280) = 12.94 | <0.0001     | F (1, 8) = 10.67  | 0.0114  | 5           |
|                                                              | 24 Morphine + Vehicle      | 24 Morphine + 24 SR-17018  | 65-240  | F (35, 350) = 2.192 | 0.0002      | F (1, 10) = 17.14 | 0.002   | 7           |
| SF3B                                                         | 24 Morphine + 24 SR-17018  | Saline + 24 SR-17018       | 65-240  | F (35, 350) = 20.51 | <0.0001     | F (1, 10) = 8.687 | 0.0146  | 5           |
|                                                              | 24 Morphine + Vehicle      | Saline + Vehicle           | 95-240  | F (29, 290) = 4.476 | <0.0001     | F (1, 10) = 13.19 | 0.0046  | 7           |
|                                                              | Saline + 24 SR-17018       | Saline + Vehicle           | 95-240  | F (29, 174) = 3.693 | <0.0001     | F (1, 6) = 15.24  | 0.0079  | 7           |
|                                                              | 24 Morphine + Vehicle      | 24 Morphine + 24 SR-17018  | 95-240  | F (29, 290) = 13.26 | <0.0001     | F (1, 10) = 48.75 | <0.0001 | 5           |
| SF3C                                                         | 24 Morphine + 24 SR-17018  | Saline + 24 SR-17018       | 95-240  | F (29, 406) = 1.924 | 0.0032      | F (1, 14) = 7.235 | 0.0176  | 7           |
|                                                              | 24 Morphine + 24 SR-17018  | Saline + 24 SR-17018       | 95-240  | F (29, 290) = 17.39 | <0.0001     | F (1, 10) = 7.040 | 0.0242  | 5           |
|                                                              | Saline + 2.5 Naloxone      | Saline + Saline            | 100-150 | F (10, 60) = 0.6125 | 0.7971      | F (1, 6) = 0.3596 | 0.5706  | 4           |
|                                                              | 24 morphine + Saline       | Saline + Saline            | 100-150 | F (10, 80) = 2.870  | 0.0042      | F (1, 8) = 6.920  | 0.0302  | 6           |
| SUMS                                                         | Saline + Saline            | 24 morphine + 2.5 naloxone | 100-150 | F (10, 80) = 1.639  | 0.1106      | F (1, 8) = 6.970  | 0.0297  | 4           |
|                                                              | 24 morphine + 2.5 naloxone | 24 morphine + Saline       | 100-150 | F (10, 100) = 5.270 | <0.0001     | F (1, 10) = 10.28 | 0.0094  | 6           |
|                                                              | 24 morphine + 2.5 naloxone | Saline + 2.5 Naloxone      | 100-150 | F (10, 80) = 1.101  | 0.3717      | F (1, 8) = 5.600  | 0.0455  | 6           |
|                                                              | 24 morphine + 2.5 naloxone | Saline + 2.5 Naloxone      | 100-150 | F (10, 80) = 1.101  | 0.3717      | F (1, 8) = 5.600  | 0.0455  | 6           |
| Ordinary one-way ANOVA, Šidák's multiple comparison post-hoc |                            |                            |         |                     |             |                   |         |             |
| Figure                                                       | Treatment                  | Compared to                | Time    | p-Value             | treatment n |                   |         |             |
| SF3A                                                         | 24 Morphine + Vehicle      | Saline + Vehicle           | 65-240  | 0.9313              | 7           | ns                |         |             |
|                                                              | Saline + 24 SR-17018       | Saline + Vehicle           | 65-240  | <0.0001             | 7           | ****              |         |             |
|                                                              | 24 Morphine + Vehicle      | 24 Morphine + 24 SR-17018  | 65-240  | 0.014               | 5           | *                 |         |             |
|                                                              | 24 Morphine + Vehicle      | 24 Morphine + 24 SR-17018  | 65-240  | 0.0491              | 7           | *                 |         |             |
| SF3B                                                         | 24 Morphine + 24 SR-17018  | Saline + 24 SR-17018       | 65-240  | <0.0001             | 5           | ****              |         |             |
|                                                              | 24 Morphine + Vehicle      | Saline + Vehicle           | 95-240  | 0.0004              | 7           | ***               |         |             |
|                                                              | Saline + 24 SR-17018       | Saline + Vehicle           | 95-240  | 0.8083              | 7           | ns                |         |             |
|                                                              | 24 Morphine + Vehicle      | 24 Morphine + 24 SR-17018  | 95-240  | 0.1414              | 5           | ns                |         |             |
| SF3C                                                         | 24 Morphine + Vehicle      | 24 Morphine + 24 SR-17018  | 95-240  | 0.0235              | 7           | *                 |         |             |
|                                                              | 24 Morphine + 24 SR-17018  | Saline + 24 SR-17018       | 95-240  | 0.8354              | 5           | ns                |         |             |
|                                                              | Saline + 2.5 Naloxone      | Saline + Saline            | 100-150 | >0.9999             | 4           | ns                |         |             |
|                                                              | 24 morphine + Saline       | Saline + Saline            | 100-150 | 0.0093              | 6           | **                |         |             |
| SUMS                                                         | Saline + Saline            | 24 morphine + 2.5 naloxone | 100-150 | >0.9999             | 4           | ns                |         |             |
|                                                              | 24 morphine + 2.5 naloxone | 24 morphine + Saline       | 100-150 | 0.0046              | 6           | **                |         |             |
|                                                              | 24 morphine + 2.5 naloxone | Saline + 2.5 Naloxone      | 100-150 | >0.9999             | 6           | ns                |         |             |
|                                                              | 24 morphine + 2.5 naloxone | Saline + 2.5 Naloxone      | 100-150 | >0.9999             | 6           | ns                |         |             |

**Figure S3.** SR-17018 reversal of morphine-induced locomotor activity. The basal activity was recorded for 30 minutes followed by 30- (A) or 60-minute (B) treatment with saline or morphine (24 mg/kg, i.p.) before vehicle

or SR-17018 (24 mg/kg, i.p.) challenge in male C57BL6 mice (n = 4–8). Effects over time (*left*) and sum or the distance traveled (cm) from 65–240 minutes for individual mice (*right*) are shown in (A–B). C. Naloxone (2.5 mg/kg, i.p.) reversal after 60 minutes of morphine locomotor activity is shown for reference (n = 4–6). Comparison of sums are indicated in the figure. Sums figures have different Y-axis scales based on the maximal stimulation per treatment combination and we are showing individual sums per mouse. D. Table showing least square mean differences Tukey HSD analysis for pretreatment x second treatment interactions after saline or morphine + vehicle, SR-17018, or naloxone challenge. Data are presented as mean  $\pm$  SEM of the total distance (cm).

#### A. Locomotor Activity: SR-15099 + Morphine

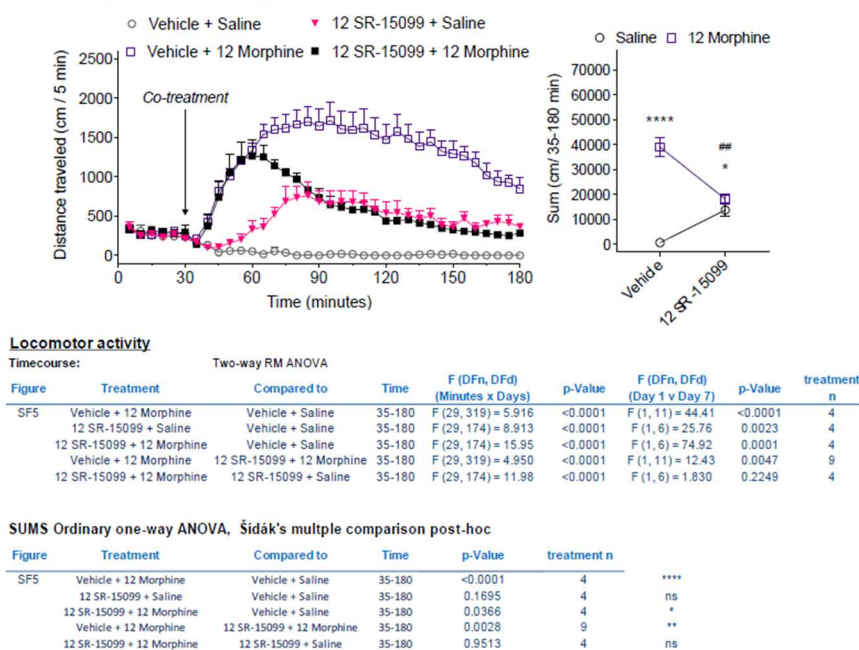

**Figure S4.** Co-treatment of morphine with SR-15099 attenuates morphine-induced hyperactivity. *In vivo* drug interactions in the open field locomotor activity assay showing total distance traveled (cm/ 5-minutes) (*left*) with total distance sums after co-treatment (cm/ 35-180 minutes) (*right*) in male C57BL/6 (n = 4–7). Locomotor activity after cotreatment with vehicle or SR-15099 (12 mg/kg, i.p.) and saline or morphine (12 mg/kg, i.p.). SR-15099 and morphine drug combination attenuate morphine's hyperactivity to the level of SR-15099. Comparison of sums are shown in the figure. Data are presented as mean  $\pm$  SEM.



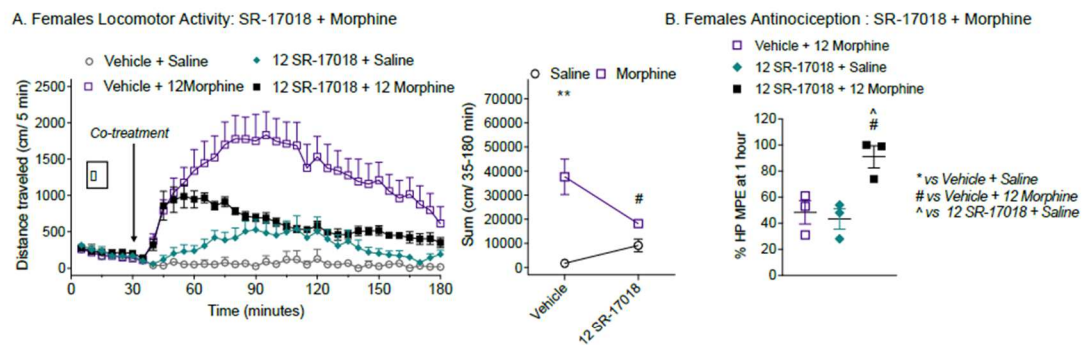

#### Locomotor Activity

| TIMECOURSE |                           | Two-way RM ANOVA          |        |                             |          |                             |          |             |
|------------|---------------------------|---------------------------|--------|-----------------------------|----------|-----------------------------|----------|-------------|
| Figure     | Treatment                 | Compared to               | Time   | F (DFn, DFd)<br>time x drug | p-Value  | F (DFn, DFd)<br>drug effect | p-Value  | treatment n |
| SF4a       | Vehicle + 12 Morphine     | Vehicle + Saline          | 35-180 | F (29, 203) = 6.199         | P<0.0001 | F (1, 7) = 11.12            | P=0.0125 | 6           |
|            | 12 SR-17018 + Saline      | Vehicle + Saline          | 35-180 | F (29, 145) = 2.521         | P=0.0002 | F (1, 5) = 5.285            | P=0.0699 | 4           |
|            | 12 SR-17018 + 12 Morphine | Vehicle + Saline          | 35-180 | F (29, 290) = 7.029         | P<0.0001 | F (1, 10) = 6.869           | P=0.0256 | 6           |
|            | Vehicle + 12 Morphine     | 12 SR-17018 + 12 Morphine | 35-180 | F (29, 290) = 7.029         | P<0.0001 | F (1, 10) = 6.869           | P=0.0256 | 6           |
|            | 12 SR-17018 + 12 Morphine | 12 SR-17018 + Saline      | 35-180 | F (29, 232) = 4.238         | P<0.0001 | F (1, 8) = 13.14            | P=0.0067 | 6           |

#### Sums Ordinary one-way ANOVA, Šidák's multiple comparison post-hoc

| Figure | Treatment                 | Compared to               | Time   | p-Value | treatment n |
|--------|---------------------------|---------------------------|--------|---------|-------------|
| SF4a   | Vehicle + 12 Morphine     | Vehicle + Saline          | 35-180 | 0.0014  | 6           |
|        | 12 SR-17018 + Saline      | Vehicle + Saline          | 35-180 | 0.9099  | 4           |
|        | 12 SR-17018 + 12 Morphine | Vehicle + Saline          | 35-180 | 0.216   | 6           |
|        | Vehicle + 12 Morphine     | 12 SR-17018 + 12 Morphine | 35-180 | 0.0342  | 6           |
|        | 12 SR-17018 + 12 Morphine | 12 SR-17018 + Saline      | 35-180 | 0.699   | 6           |

vehicle+saline n=3

#### Hot Plate Latency

Ordinary one-way ANOVA, Šidák's multiple comparison post-hoc

|      | Treatment                 | Compared to           | Time | p-Value | treatment n |
|------|---------------------------|-----------------------|------|---------|-------------|
| SF4b | Vehicle + 12 Morphine     | 12 SR-17018 + Saline  | 1h   | 0.90960 | 3           |
|      | 12 SR-17018 + 12 Morphine | Vehicle + 12 Morphine | 1h   | 0.0274  | 3           |
|      | 12 SR-17018 + 12 Morphine | 12 SR-17018 + Saline  | 1h   | 0.017   | 3           |

**Figure S5.** In female mice, co-treatment of morphine with SR-17018 decreases morphine-induced hyperactivity without attenuating antinociception. Results recapitulate in female C57BL6 mice testing for SR-17018 + morphine locomotor (n = 3–6) and antinociception (n = 3) Doses are indicated as mg/kg, i.p. in the figure legends. Data are presented as mean ± SEM. .
